# Supplementary material
Source: bioRxiv or medRxiv preprint supplement (https://www.biorxiv.org/highwire/filestream/34734/field_highwire_adjunct_files/0/118935-1.pdf)
Supplement: Supplementary file [file 118935-1.pdf]

1 **Supplementary Figures**

2

3 Supplementary Figure 1. **Dynactin components track MT plus-ends together**  
4 **with DHC-1.**

5 (A, B) Representative simultaneous dual-color SDCLM images of mCherry::DHC-1  
6 (red) and either GFP::DNC-1(A) or GFP::DNC-2 (B) localization during mitosis.

7 Images are averages of 5 consecutive frames taken from 100 ms stream-lapse  
8 movies, after background subtraction by a gaussian blur filter. Scale bars, 1  $\mu$ m.

9

**A**

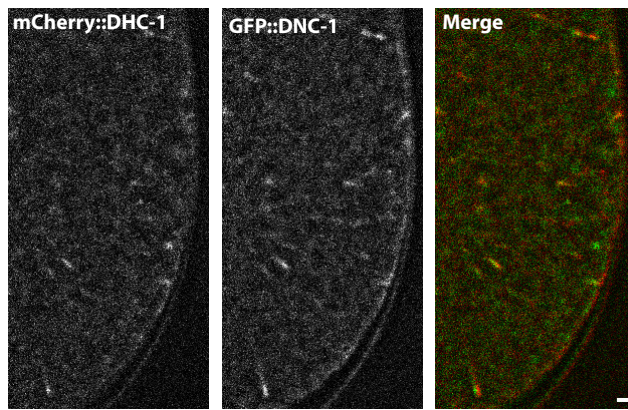

**B**

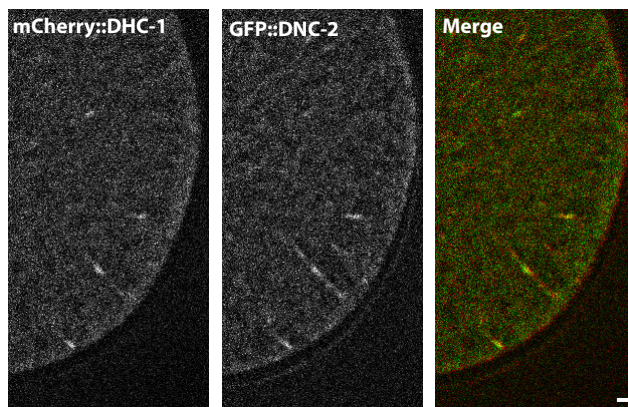

1 Supplementary Figure 2. **Dynein localization to the spindle midzone,**  
2 **kinetochores, kinetochore MTs and poles is not altered upon loss of EBP-**  
3 **1/2/3.**

4 (A) Schematic representation (left) of approach to measure eGFP::DHC-1 (right)  
5 intensity along the mitotic spindle. Scale bar, 5  $\mu$ m.

6 (B) Representative SDCLM images of eGFP::DHC-1 localization in different wt or  
7  $\Delta ebp$  mutant backgrounds as indicated in each image, both during metaphase and  
8 early anaphase. Scale bar, 5  $\mu$ m.

9 (C) Quantification of dynein distribution along the horizontal axis of the spindle  
10 (box 1 in (A)) in different genetic backgrounds as indicated in the graph,  
11 represented as average (N=4 spindles per condition) intensity normalized to  
12 average cytoplasmic values (measured in box 2 in (A)). Spindle length in pixels.  
13



1 Supplementary Figure 3. **Characterization of key mitotic events in  $\Delta ebp$  mutant**  
2 **embryos.**

3 Quantification of key mitotic events from DIC time-lapse movies of N2 (green),  
4  $\Delta ebp-2$  (light blue),  $\Delta ebp-1/3$  (dark blue) and  $\Delta ebp-1/2/3$  (purple) embryos during  
5 the first division. Asymmetry (A), position of pronuclear meeting (PNM, C) and  
6 centration (D) and spindle elongation (F) are plotted as a percentage of total  
7 embryo length, embryo size (B) as the ratio of embryo length over embryo height,  
8 and metaphase spindle angle as the angle relative to the embryo A-P axis. Bars  
9 represent average ( $N \geq 10$ ) + SD, \*  $P < 0.05$ , \*\*  $P < 0.01$ , \*\*\*\*  $P < 0.0001$  compared to  
10 wt, no indication means no significant difference from wt. Unpaired Welch  
11 Student's *t*-test.

12

Fig. S3

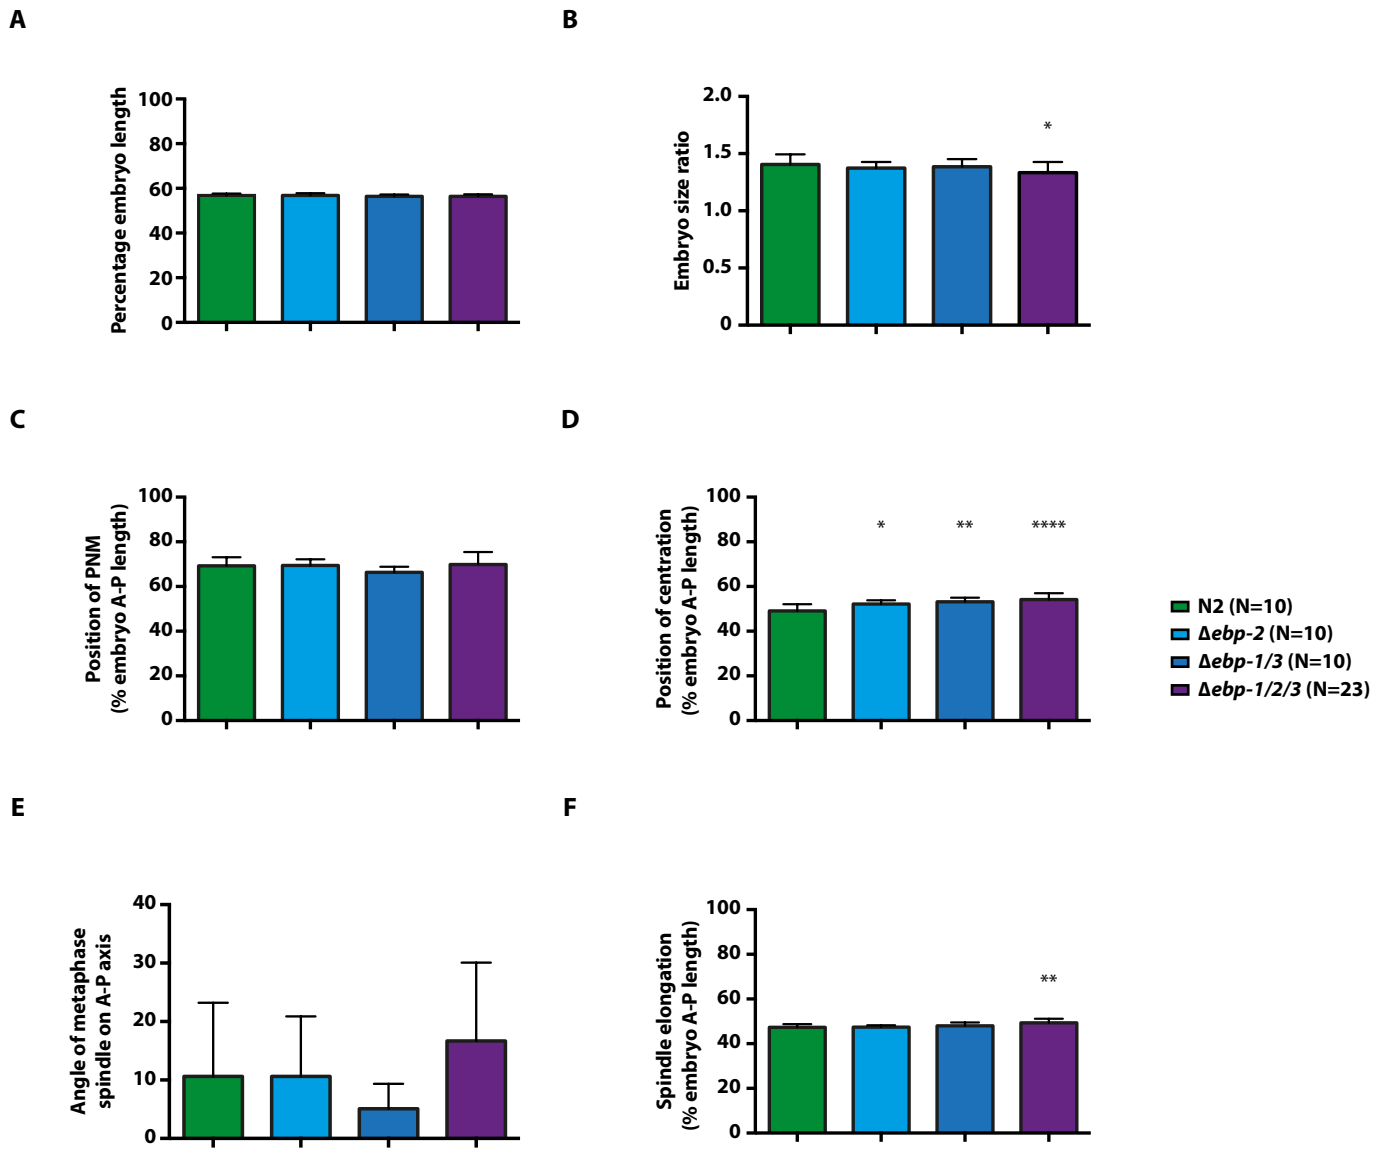

1 Supplementary Figure 4. **Quantification of timing of mitotic events in  $\Delta ebp$**   
2 **mutant one-cell embryos.**  
3 Quantification of duration of mitotic events from DIC time-lapse movies of N2  
4 (green),  $\Delta ebp-2$  (light blue),  $\Delta ebp-1/3$  (dark blue) and  $\Delta ebp-1/2/3$  (purple) embryos  
5 during the first division. Duration in seconds. Bars represent average ( $N \geq 9$ ) + SD, \*  
6  $P < 0.05$ , \*\*  $P < 0.01$ , \*\*\*  $P < 0.001$ , \*\*\*\*  $P < 0.0001$  compared to wt, no indication  
7 means no significant difference from wt. Unpaired Welch Student's *t*-test.  
8

Fig. S4

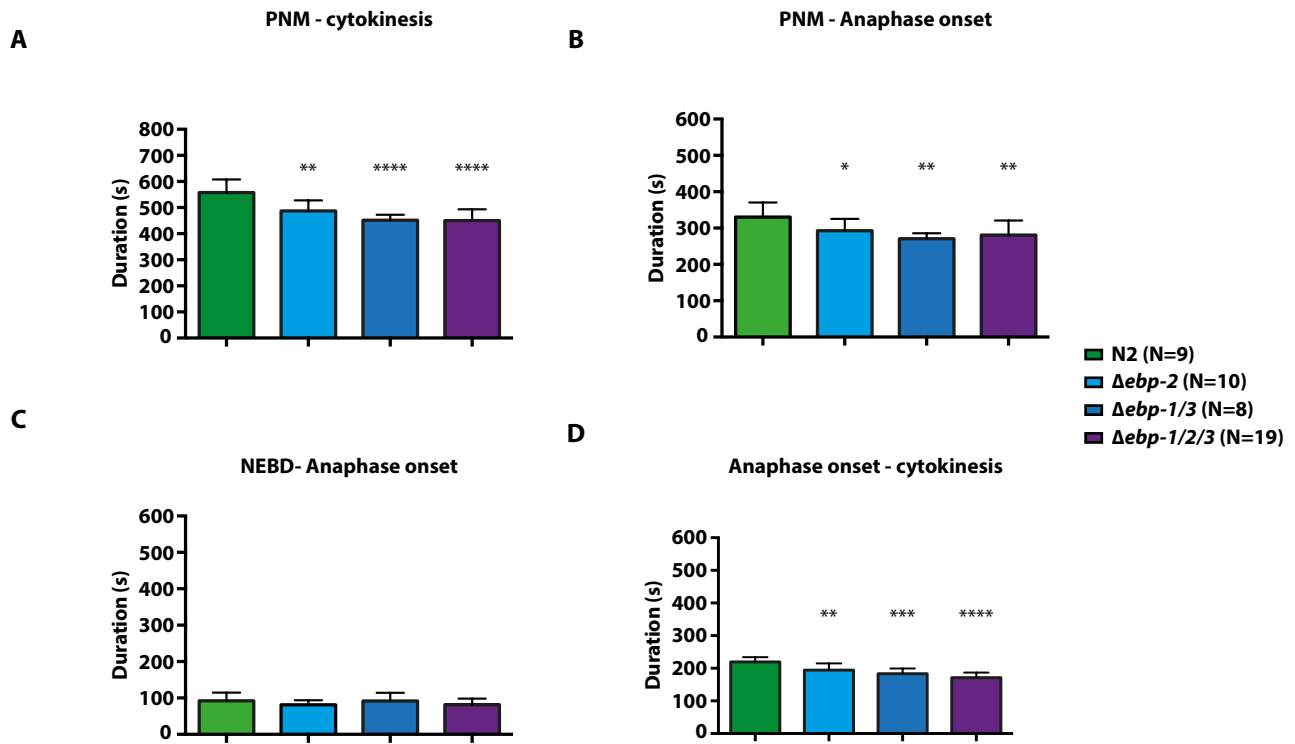



1 Supplementary Figure 5. **EBP-2 is required for proper spindle midzone**

2 **establishment.**

3 (A) Schematic representation (left) of approach to measure MT (right) density along  
4 the mitotic spindle.

5 (B) Montages of representative SDCLM movies of one-cell embryos expressing  
6 either GFP::TBB-2 or TBA-2::YFP (MTs), in different wt or  $\Delta ebp$  mutant backgrounds  
7 as indicated in each image. Montages are generated from seven consecutive  
8 frames from time-lapse movies acquired at a rate of 1 frame per 5 seconds, all  
9 acquired with the same laser power and exposure time of 500 ms. Scale bar, 1  $\mu\text{m}$ .

10 (C) Quantification of MT abundance along the horizontal axis of the spindle in  
11 different genetic backgrounds during early anaphase as indicated in the graph,  
12 represented as average (N=7 spindles) intensity relative to the maximum value of  
13 all data sets. Spindle length in pixels.

Fig. S5

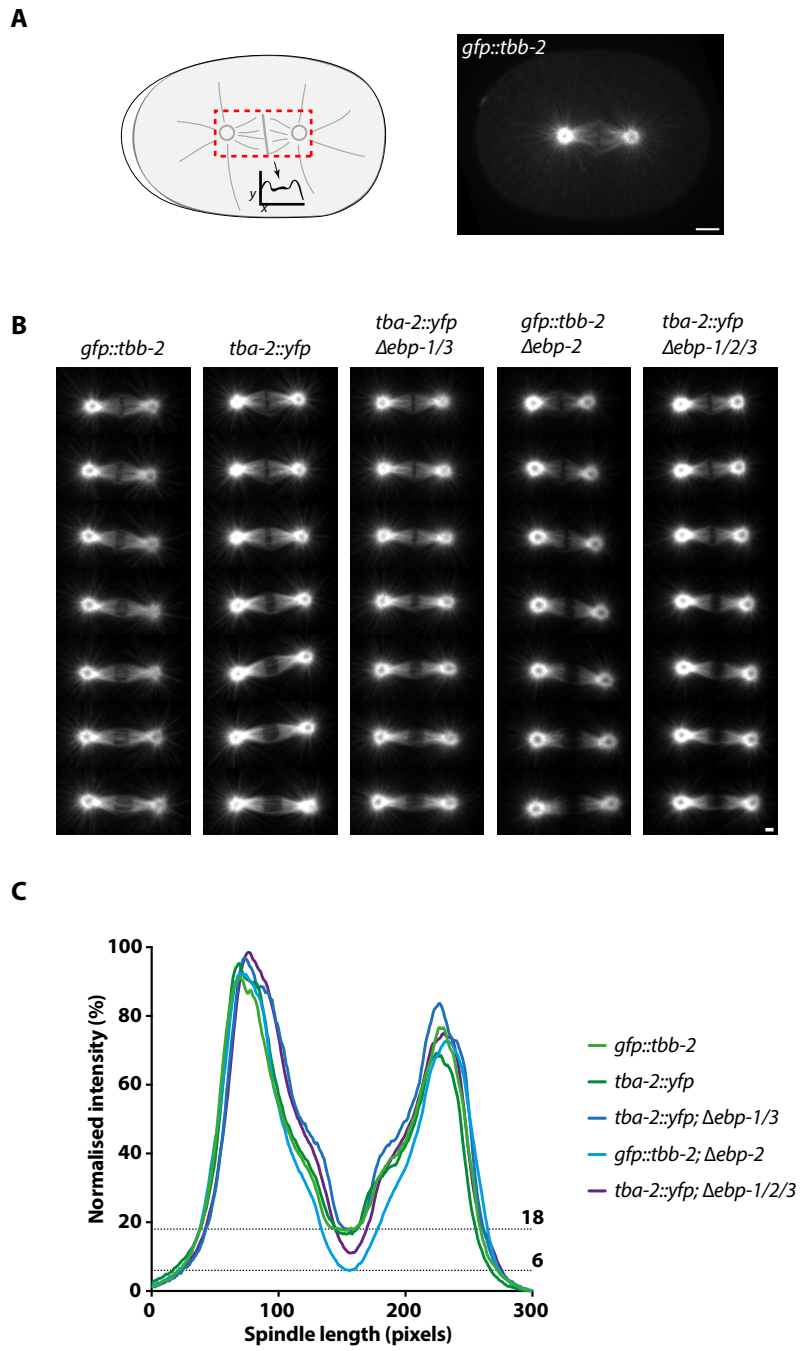

1 **Online supplemental material**

2

3 Supplementary Movie 1. **Co-localization of mCherry::DHC-1 comets with astral**  
4 **MTs.**

5 Simultaneous dual-color SDCLM movie of mCherry::DHC-1 (red) and GFP::TBB-2  
6 (MTs, green) localization at the posterior pole during mitosis in a one-cell *C. elegans*  
7 embryo. Images were streamed with 100 ms exposure time, averaged for each 2  
8 consecutive frames, and displayed at 15 frames per second. Movie corresponds to  
9 figure 2A.

10

11 Supplementary Movie 2. **Co-localization of mCherry::DHC-1 comets with EBP-**  
12 **2::GFP.**

13 Simultaneous dual-color SDCLM movie of mCherry::DHC-1 (red) and EBP-2::GFP  
14 (MT plus-end, green) localization at the posterior pole during mitosis in a one-cell  
15 *C. elegans* embryo. Images were streamed with 100 ms exposure time, averaged for  
16 each 2 consecutive frames, and displayed at 15 frames per second. Movie  
17 corresponds to figure 2B.

18

19 Supplementary Movie 3. **Cortical co-localization of mCherry::DHC-1 comets**  
20 **with astral MTs.**

21 Simultaneous dual-color TIRF movie of mCherry::DHC-1 (red) and GFP::TBB-2 (MTs,  
22 green) cortical localization during mitosis in a one-cell *C. elegans* embryo. Images  
23 were streamed with 100 ms exposure time, averaged for each 5 consecutive frames

1 after background subtraction by a gaussian blur filter, and displayed at 10 frames  
2 per second with the posterior to the right. Movie corresponds to figure 2E.

3

4 Supplementary Movie 4. **Cortical co-localization of mCherry::DHC-1 comets**  
5 **with EBP-2::GFP.**

6 Simultaneous dual-color TIRF movie of mCherry::DHC-1 (red) and EBP-2::GFP (MT  
7 plus-end, green) cortical localization during mitosis in a one-cell *C. elegans* embryo.

8 Images were streamed with 100 ms exposure time, averaged for each 5

9 consecutive frames after background subtraction by a gaussian blur filter, and

10 displayed at 10 frames per second with the posterior to the right. Movie

11 corresponds to figure 2F.

12

13 Supplementary Movie 5. **Co-localization of mCherry::DHC-1 comets with**  
14 **PH::eGFP membrane invaginations.**

15 Simultaneous dual-color SDCLM movie of mCherry::DHC-1 (red) and PH::eGFP

16 (plasma membrane, green) localization at the posterior pole during mitosis in a

17 one-cell *C. elegans* embryo. Images were streamed with 100 ms exposure time,

18 averaged for each 2 consecutive frames, and displayed at 10 frames per second.

19 Movie corresponds to figure 2G.

20

21

22

1 Supplementary Movie 6. **Localization of eGFP::DHC-1 in  $\Delta ebp$  mutant**

2 **backgrounds.**

3 Single-color SDCLM movies of eGFP::DHC-1 localization during mitosis in one-cell  
4 *C. elegans* embryos of otherwise wt (left),  $\Delta ebp-1/3$  (middle) and  $\Delta ebp-2$  (right)  
5 genetic backgrounds. Images were acquired every 5 seconds with 1000 ms  
6 exposure time and equal laser power, background corrected and displayed at 5  
7 frames per second with the posterior to the right. Movies correspond to figure 3A.

8

9 Supplementary Movie 7. **Time-lapse DIC movies of wt and  $\Delta ebp$  embryos.**

10 Wide-field DIC movies of (from left to right) N2,  $\Delta ebp-2$ ,  $\Delta ebp-1/3$  and  $\Delta ebp-1/2/3$   
11 one-cell *C. elegans* embryos during mitosis. Images were acquired every 2 seconds  
12 with 15 ms exposure time, equal transmitted light intensities and displayed at 20  
13 frames per second with the posterior to the right. Movies correspond to figure 3E.

14

15 Supplementary Movie 8. **Two distinct cortical populations of eGFP::DHC-1.**

16 Single-color TIRF movies of eGFP::DHC-1 cortical localization in (from left to right)  
17 otherwise wt,  $\Delta ebp-1/3$ ,  $\Delta ebp-2$ , *lin-5* RNAi and  $\Delta ebp-2 + lin-5$  RNAi-treated one-cell  
18 *C. elegans* embryos. Images were streamed with 50 ms exposure time, averaged for  
19 each 10 consecutive frames after background subtraction by a gaussian blur filter,  
20 and displayed at 10 frames per second. Movies correspond to figure 4B.

21

22

23

1 Supplementary Movie 9. **UV-laser mediated spindle midzone severing.**

2 Single-color SDCLM movie of GFP::TBB-2 (MTs) UV-laser-mediated spindle bisection  
3 at anaphase onset in a one-cell *C. elegans* embryo. Images were streamed with 500  
4 ms exposure time and displayed at 15 frames per second with the posterior to the  
5 right. Movie corresponds to figure 5B.

6

7 Supplementary Movie 10. **Residence time of end-on MT-cortex contacts.**

8 Single-color TIRF movie of GFP::TBB-2 (MTs) cortical localization in a one-cell *C.*  
9 *elegans* embryo. Images were streamed with 500 ms exposure time and displayed  
10 at 10 frames per second with the posterior to the right. Movie corresponds to  
11 figure 5D.

12

13

| I. Table 1 |                                                                                        |
|------------|----------------------------------------------------------------------------------------|
| Strain     | Genotype                                                                               |
| N2         | Wild type                                                                              |
| SV1598     | he248[dhc-1::mcherry]                                                                  |
| SV1619     | he250[mcherry::dhc-1]                                                                  |
| SV1635     | he244 [egfp::lin-5]; he250[mcherry::dhc-1]                                             |
| TH65       | ddl5 [[unc-119(+) + C47B2.3(genomic)::YFP]]                                            |
| AZ224      | Ruls57[Ppie-1::gfp::tbb-2]                                                             |
| SV1702     | Ruls57[Ppie-1::gfp::tbb-2]; he250[mcherry::dhc-1]                                      |
| SV1703     | he258[Peft-3::ph::egfp::lov::tbb-2-3'UTR]; he250[mcherry::dhc-1]                       |
| SV1803     | he264[egfp::dhc-1]                                                                     |
| SV1840     | ojls5[pie-1::GFP::dnc-1 + unc-119(+)]; he250[mcherry::dhc-1]                           |
| SV1841     | ojls57[Ppie-1::gfp::dnc-2 unc-119(+)]; he250[mcherry::dhc-1]                           |
| SV1857     | abcls3[Ppie-1::ebp-2::gfp; unc-119(+)]; he250[mcherry::dhc-1]                          |
| SV1868     | he278[Δebp-2]                                                                          |
| SV1872     | he279[Δebp-1, ΔY59A8B.25, Δebp-3]                                                      |
| SV1873     | he278[Δebp-2]; he263[egfp::dhc-1]                                                      |
| SV1874     | he278[Δebp-2]; Ruls57[Ppie-1::gfp::tbb-2]                                              |
| SV1877     | he278[Δebp-2]; he279[Δebp-1, ΔY59A8B.25, Δebp-3]                                       |
| SV1878     | he279[Δebp-1, ΔY59A8B.25, Δebp-3]; he263[egfp::dhc-1]                                  |
| SV1879     | he279[Δebp-1, ΔY59A8B.25, Δebp-3]; ddl5 [[unc-119(+) + C47B2.3(genomic)::YFP]]         |
| SV1900     | [unc-119(+) + C47B2.3(genomic)::YFP]; he278[Δebp-2]; he279[Δebp-1, ΔY59A8B.25, Δebp-3] |
